# Supplementary material for: Reversible and reusable compartmentalized thermoplastic chip for coculture of dorsal root ganglion neurons
Source: Royal Society of Chemistry journal article supplement (doi:10.1039/d5lc00666j), 2025-01-01
Supplement: d5lc00666j5.xlsx [file d5lc00666j5.xlsx]

## Sheet: Feuil1
	PDMS quantity (molding of 1mm thickness= 7,47g part A + 0,83g part B)		APTES quantity (8µL/well)	Vaccuum chamber (4 chips/use)		Hood			Microscope	Plasma (10min/6 chips)			Heating plate	Oven (80°C) (4 puces)		Consommables						Total
1 PDMS chip	Chip molding	Tanks molding	Coating	PDMS degazing	Mold degazing	Molding	Cut/Punch	Assembling/Cleaning/Bonding	Check leaks	Tanks	APTES	Patterns	APTES	Heating	Polymerisation	6-wells plate	EtOH 70%	milliQ water	Tape	Paper cup	Aluminium
Weight	4.15	2.76667	7.568	NA	NA	NA	NA	NA	NA	NA	NA	NA	NA	NA	NA	10.25	33.3333	33.3333	0.1	1.4	0.5
Total	6.91667		7.568	NA	NA	NA	NA	NA	NA	NA	NA	NA	NA	NA	NA	10.25	33.3333	33.3333	0.1	1.4	0.5	85.8409
Time	NA	NA	NA	22.5	5	10	2	5	1	1.66667	1.66667	1.66667	5	6.25	30	NA	NA	NA	NA	NA	NA
Total	NA		NA	27.5		17			1	5			5	36.25		NA	NA	NA	NA	NA	NA	91.75
Power	NA	NA	NA	60	60	123	123	123	85	520	520	520	3	1000	5	NA	NA	NA	NA	NA	NA
Total	NA		NA	120		369			85	1560			3	1005		NA	NA	NA	NA	NA	NA	2137
Energy	NA	NA	NA	81	18	73.8	14.76	36.9	5.1	52	52	52	0.9	375	9	NA	NA	NA	NA	NA	NA
Total	NA		NA	99		125.46			5.1	156			0.9	384		NA	NA	NA	NA	NA	NA	770.46
Consommation	NA	NA	NA	0.022518	0.005004	0.0205164	0.00410328	0.0102582	0.0014178	0.014456	0.014456	0.014456	0.0002502	0.10425	0.002502	NA	NA	NA	NA	NA	NA
Total	NA		NA	0.027522		0.0348779			0.0014178	0.043368			0.0002502	0.106752		NA	NA	NA	NA	NA	NA	0.214188
Price	1.02995	0.686636	0.005832	0.00566553	0.00125901	0.00516193	0.00103239	0.00258096	0.000356718	0.00363713	0.00363713	0.00363713	6.29503e-05	0.0262293	0.000629503	0.553333	0.472667	Negligible	Negligible	0.025	Negligible
Total	1.71659		0.005832	0.00692454		0.00877527			0.000356718	0.0109114			6.29503e-05	0.0268588		0.553333	0.472667	Negligible	Negligible	0.025	Negligible	2.82731
	SBC quantity (1chip = 3cm²/1 tanks' molding = 4,8cm²/ 1cm²=0,47g)		Sublym press (1 molding = 3 min, 160°C, 0,07MPa) (2 chips + 4 tanks / molding)			Hood			Microscope	Plasma (10min/6 chips)	Oven (80°C) (24 chips/cycle)		Consommables				Total	Reused chip
1 SBC chip	Chip molding	Tanks molding	Heating	Embossing	Waiting	Mold	Cut/Punch	Assembling/Cleaning/Bonding	Check leaks	Hydrophilsation	Heating	Annealing	6-wells plate	EtOH 70%	milliQ water	Tape
Weight	1.41	2.256	NA	NA	NA	NA	NA	NA	NA	NA	NA	NA	10.25	33.3333	33.3333	0.1
Total	3.666		NA	NA	NA	NA	NA	NA	NA	NA	NA	NA	10.25	33.3333	33.3333	0.1	80.6827	77.0167
Time	NA	NA	8	4.5	1.5	14	2	3	2	1.66667	1.04167	5	NA	NA	NA	NA
Total	NA		14			19			2	1.66667	6.04167		NA	NA	NA	NA	42.7083	24.7083
Power	NA	NA	45	4.5	0.4	123	123	123	85	520	1000	5	NA	NA	NA	NA
Total	NA		49.9			369			85	520	1005		NA	NA	NA	NA	1023.9
Energy	NA	NA	21.6	1.215	0.036	103.32	14.76	22.14	10.2	52	62.5	1.5	NA	NA	NA	NA
Total	NA	NA		22.851			140.22		10.2	52	64		NA	NA	NA	NA	289.271	195.317
Consommation	NA	NA	0.0060048	0.00033777	1.0008e-05	0.028723	0.00410328	0.00615492	0.0028356	0.014456	0.017375	0.000417	NA	NA	NA	NA
Total	NA		0.00635258			0.0389812			0.0028356	0.014456	0.017792		NA	NA	NA	NA	0.0350836	0.0391869
Price	0.7896	1.26336	0.00151081	8.49829e-05	2.51801e-06	0.0072267	0.00103239	0.00154858	0.000713437	0.00363713	0.00437155	0.000104917	0.553333	0.472667	Negligible	Negligible
Total	2.05296		0.00159831			0.00980766			0.000713437	0.00363713	0.00447647		0.553333	0.472667	Negligible	Negligible	3.09919	1.72398
